# Supplementary material for: Venous Thromboembolism After COVID-19 Infection Among People With and Without Immune-Mediated Inflammatory Diseases
Source: PubMed Central journal article supplement (PMC10562941; doi:10.1001/jamanetworkopen.2023.37020), 2023-10-09
Supplement: jamanetwopen-e2337020-s001.pdf [file jamanetwopen-e2337020-s001.pdf]

## Supplemental Online Content

Khan R, Kuenzig ME, Tang F, et al. Venous thromboembolism after COVID-19 infection among people with and without immune-mediated inflammatory diseases. *JAMA Netw Open*. 2023;6(10):e2337020. doi:10.1001/jamanetworkopen.2023.37020

**eTable 1.** Algorithms used to identify individuals with immune-mediated inflammatory diseases

**eTable 2.** International Classification of Diseases (ICD)-10 codes used to identify individuals developing a venous thromboembolism

**eTable 3.** International Classification of Disease (ICD)-10 codes for immune-mediated inflammatory diseases that were excluded from the adapted version of the Charlson Comorbidity Index used in this study

**eTable 4.** Previously validated algorithms used to identify individuals with selected comorbidities

**eTable 5.** Demographics and clinical characteristics of individuals with immune-mediated inflammatory diseases (IMIDs) and matched people without an IMID on the date of positive COVID-19 test, stratified by type of IMID

**eFigure 1.** Forest plot depicting the unadjusted hazard ratio of venous thromboembolism among individuals with and without (reference) an immune-mediated inflammatory disease (IMID) following COVID-19 infection, stratified by type of IMID

**eFigure 2.** Forest plot depicting the hazard ratio of venous thromboembolism among individuals with and without (reference) an immune-mediated inflammatory disease (IMID) following COVID-19 infection, adjusted for previous VTE and COVID-19 vaccination stratified by type of IMID

**eReferences.**

This supplemental material has been provided by the authors to give readers additional information about their work.

**eTable 1. Algorithms used to identify individuals with immune-mediated inflammatory diseases**

| Type of IMID                                                                                 | Diagnostic Codes <sup>a</sup>                                                                 | Algorithm                                                                                                                                                                                                                                                                                                                                                                                                                                                                                                                                                                                                                                      | Accuracy                                                                                                                                                                                                                                                                                                                                                                                                           | Defining IMID Duration                                                                                                                                                                                                                                                                                |
|----------------------------------------------------------------------------------------------|-----------------------------------------------------------------------------------------------|------------------------------------------------------------------------------------------------------------------------------------------------------------------------------------------------------------------------------------------------------------------------------------------------------------------------------------------------------------------------------------------------------------------------------------------------------------------------------------------------------------------------------------------------------------------------------------------------------------------------------------------------|--------------------------------------------------------------------------------------------------------------------------------------------------------------------------------------------------------------------------------------------------------------------------------------------------------------------------------------------------------------------------------------------------------------------|-------------------------------------------------------------------------------------------------------------------------------------------------------------------------------------------------------------------------------------------------------------------------------------------------------|
| Ankylosing spondylitis                                                                       | <p><i>OHIP: 720</i><br/> <i>ICD-9: 720.0</i><br/> <i>ICD-10: M45</i></p>                      | <ul style="list-style-type: none"> <li>• ≥3 physician claims including ≥1 by a rheumatologist or general internist within 3 years, or</li> <li>• ≥1 hospitalization with any of the specified ICD-9 or ICD-10 codes listed as reason for hospitalization or co-morbid condition (primary, secondary, or type 3 diagnosis)</li> </ul>                                                                                                                                                                                                                                                                                                           | N/A (not validated)                                                                                                                                                                                                                                                                                                                                                                                                | Time from first diagnostic code to date of infection                                                                                                                                                                                                                                                  |
| Inflammatory bowel disease, including subtypes Crohn's disease and ulcerative colitis (1, 2) | <p><i>OHIP: 555, 556</i><br/> <i>ICD-9: 555.x, 556.x</i><br/> <i>ICD-10: K50.x, K51.x</i></p> | <p><b>Identifying IBD Cases</b></p> <p>Pediatrics (&lt;18y):</p> <ul style="list-style-type: none"> <li>• Underwent colonoscopy: ≥4 physician claims or ≥2 hospitalizations within 3 years, or</li> <li>• Did not undergo colonoscopy: ≥7 physician claims or ≥3 hospitalizations within 3 years</li> </ul> <p>Adults (18-64y):</p> <ul style="list-style-type: none"> <li>• ≥5 physician claims or hospitalizations within 4 years</li> </ul> <p>Seniors (≥65y):</p> <ul style="list-style-type: none"> <li>• ≥5 physician claims or hospitalizations within 4 years, and</li> <li>• ≥1 prescription for an IBD-related medication</li> </ul> | <p><b>Identifying IBD Cases<sup>b</sup></b></p> <p>Pediatrics (&lt;18y):</p> <ul style="list-style-type: none"> <li>• Sens: 89.6% (91.1%)</li> <li>• Spec: &gt;99.9% (99.5%)</li> <li>• PPV: 59.2%</li> <li>• NPV: &gt;99.9%</li> </ul> <p>Adults (18-64y):</p> <ul style="list-style-type: none"> <li>• Sens: 76.8% (92.3%)</li> <li>• Spec: 96.2% (99.1%)</li> <li>• PPV: 81.4%</li> <li>• NPV: 95.0%</li> </ul> | <p>For incident cases (3y washout period for pediatrics, 8 y washout for adults, seniors):</p> <ul style="list-style-type: none"> <li>• Time from first diagnostic code to date of infection</li> </ul> <p>For prevalent cases (did not meet minimum washout period for incident cases): ≥5 years</p> |

| Type of IMID           | Diagnostic Codes <sup>a</sup>                                            | Algorithm                                                                                                                                                                                                                                                                       | Accuracy                                                                                                                                                                                                                                                                                                                                                                                                                                                                  | Defining IMID Duration                               |
|------------------------|--------------------------------------------------------------------------|---------------------------------------------------------------------------------------------------------------------------------------------------------------------------------------------------------------------------------------------------------------------------------|---------------------------------------------------------------------------------------------------------------------------------------------------------------------------------------------------------------------------------------------------------------------------------------------------------------------------------------------------------------------------------------------------------------------------------------------------------------------------|------------------------------------------------------|
|                        |                                                                          | <p><b>Differentiating subtypes of IBD:</b></p> <p>Pediatrics:</p> <ul style="list-style-type: none"> <li>• 5 of last 7 outpatient contacts</li> </ul> <p>Adults/Seniors:</p> <ul style="list-style-type: none"> <li>• 5 of last 9 outpatient contacts</li> </ul>                | <p>Seniors (≥65y):</p> <ul style="list-style-type: none"> <li>• Sens: 59.3% (78.3%)</li> <li>• Spec: 99.0% (98.2%)</li> <li>• PPV: 71.1%</li> <li>• NPV: 98.3%</li> </ul> <p><b>Differentiating subtypes of IBD:</b></p> <p>Pediatrics:</p> <ul style="list-style-type: none"> <li>• Sens: 95.1%</li> <li>• Spec: 86.0%</li> <li>• PPV: 92.0%</li> <li>• NPV: 91.2%</li> </ul> <p>Adults/Seniors:</p> <ul style="list-style-type: none"> <li>• Accuracy: 91.1%</li> </ul> |                                                      |
| Multiple sclerosis (3) | <p><i>OHIP: 340</i><br/> <i>ICD-9: 340</i><br/> <i>ICD-10: G35</i></p>   | <ul style="list-style-type: none"> <li>• ≥ 5 physician claims within 2 years, or</li> <li>• ≥1 hospitalization with any of the specified ICD-9 or ICD-10 codes listed as reason for hospitalization or co-morbid condition (primary, secondary, or type 3 diagnosis)</li> </ul> | <ul style="list-style-type: none"> <li>• Sens: 84.2%</li> <li>• Spec: 100%</li> <li>• PPV: 86.0%</li> <li>• NPV: 99.9%</li> </ul>                                                                                                                                                                                                                                                                                                                                         | Time from first diagnostic code to date of infection |
| Polymyalgia rheumatica | <p><i>OHIP: 725</i><br/> <i>ICD-9: 725</i><br/> <i>ICD-10: M35.3</i></p> | <ul style="list-style-type: none"> <li>• ≥3 physician claims including ≥1 with a rheumatologist or</li> </ul>                                                                                                                                                                   | N/A (not validated)                                                                                                                                                                                                                                                                                                                                                                                                                                                       | Time from first diagnostic code to date of infection |

| Type of IMID            | Diagnostic Codes <sup>a</sup>                                                                                                                     | Algorithm                                                                                                                                                                                                                                                                                                                                                       | Accuracy                                                                                                                                                                                                                                                                                                           | Defining IMID Duration                               |
|-------------------------|---------------------------------------------------------------------------------------------------------------------------------------------------|-----------------------------------------------------------------------------------------------------------------------------------------------------------------------------------------------------------------------------------------------------------------------------------------------------------------------------------------------------------------|--------------------------------------------------------------------------------------------------------------------------------------------------------------------------------------------------------------------------------------------------------------------------------------------------------------------|------------------------------------------------------|
|                         |                                                                                                                                                   | <p>general internist within 3 years, or</p> <ul style="list-style-type: none"> <li>• ≥1 hospitalization with any of the specified ICD-9 or ICD-10 codes listed as reason for hospitalization or co-morbid condition (primary, secondary, or type 3 diagnosis)</li> </ul>                                                                                        |                                                                                                                                                                                                                                                                                                                    |                                                      |
| Psoriasis (4)           | <p><i>OHIP</i>: 696<br/> <i>ICD-9</i>: 696.1, 696.8<br/> <i>ICD-10</i>: L40.0, L40.1, L40.2, L40.3, L40.4, L40.8, L40.9</p>                       | <ul style="list-style-type: none"> <li>• ≥3 physician claims, or</li> <li>• ≥1 hospitalization with any of the specified ICD-9 or ICD-10 codes listed as reason for hospitalization or co-morbid condition (primary, secondary, or type 3 diagnosis)</li> </ul>                                                                                                 | <p>Definite psoriasis:</p> <ul style="list-style-type: none"> <li>• Spec: 40.6%</li> <li>• PPV: 99.4%</li> <li>• NPV: 71.0%</li> </ul> <p>Definite and possible psoriasis:</p> <ul style="list-style-type: none"> <li>• Sens: 98.0%</li> <li>• Spec: 30.8 %</li> <li>• PPV: 99.5%</li> <li>• NPV: 74.7%</li> </ul> | Time from first diagnostic code to date of infection |
| Psoriatic arthritis (4) | <p><i>OHIP</i>: 696 (psoriasis), 721 (spondylarthritis)<br/> <i>ICD-9</i>: 696.0<br/> <i>ICD-10</i>: L40.5, M07.0, M07.1, M07.2, M07.3, M09.0</p> | <ul style="list-style-type: none"> <li>• ≥3 physician claims with a diagnostic code for spondylarthritis including ≥1 by a rheumatologist or general internist and ≥1 physician claim with a diagnostic code for psoriasis (by any specialty), or</li> <li>• ≥1 hospitalization with any of the specified ICD-9 or ICD-10 codes listed as reason for</li> </ul> | <p>Definite psoriatic arthritis:</p> <ul style="list-style-type: none"> <li>• Sens: 48.1%</li> <li>• Spec: 99.9%</li> <li>• PPV: 66.1%</li> <li>• NPV: 99.9%</li> </ul> <p>Definite and possible psoriatic arthritis:</p>                                                                                          | Time from first diagnostic code to date of infection |

| Type of IMID                          | Diagnostic Codes <sup>a</sup>                                                        | Algorithm                                                                                                                                                                                                                                                                                                                            | Accuracy                                                                                                                                                                                                                                                                                                   | Defining IMID Duration                               |
|---------------------------------------|--------------------------------------------------------------------------------------|--------------------------------------------------------------------------------------------------------------------------------------------------------------------------------------------------------------------------------------------------------------------------------------------------------------------------------------|------------------------------------------------------------------------------------------------------------------------------------------------------------------------------------------------------------------------------------------------------------------------------------------------------------|------------------------------------------------------|
|                                       |                                                                                      | hospitalization or co-morbid condition (primary, secondary, or type 3 diagnosis)                                                                                                                                                                                                                                                     | <ul style="list-style-type: none"> <li>• Sens: 28.6%</li> <li>• Spec: 100%</li> <li>• PPV: 72.7%</li> <li>• NPV: 99.7%</li> </ul>                                                                                                                                                                          |                                                      |
| Rheumatoid arthritis (5, 6)           | <i>OHIP: 714</i><br><i>ICD-9: 714</i><br><i>ICD-10: M05, M06</i>                     | ≥15 years of age and <ul style="list-style-type: none"> <li>• ≥1 hospitalization, or</li> <li>• ≥3 physician claims including ≥1 with a musculoskeletal specialist (rheumatologist, orthopedic surgeon, or Internal medicine specialist) in two years</li> </ul>                                                                     | Data from selected rheumatology clinics: <ul style="list-style-type: none"> <li>• Sens: 97%</li> <li>• Spec: 85%</li> <li>• PPV: 76%</li> <li>• NPV: 98%</li> </ul> EMR data: <ul style="list-style-type: none"> <li>• Sens: 78%</li> <li>• Spec: 100%</li> <li>• PPV: 78%</li> <li>• NPV: 100%</li> </ul> | Time from first diagnostic code to date of infection |
| Systemic autoimmune rheumatic disease | <i>OHIP: 710</i><br><i>ICD-9: 710.0-710.9</i><br><i>ICD-10: M32, M33, M34, M35.0</i> | <ul style="list-style-type: none"> <li>• ≥3 physician claims including ≥1 by a rheumatologist or general internist within 3 years, or</li> <li>• ≥1 hospitalization with any of the specified ICD-9 or ICD-10 codes listed as reason for hospitalization or co-morbid condition (primary, secondary, or type 3 diagnosis)</li> </ul> | N/A (not validated)                                                                                                                                                                                                                                                                                        | Time from first diagnostic code to date of infection |

| Type of IMID | Diagnostic Codes <sup>a</sup>                                                                                                        | Algorithm                                                                                                                                                                                                                                                                                          | Accuracy            | Defining IMID Duration                               |
|--------------|--------------------------------------------------------------------------------------------------------------------------------------|----------------------------------------------------------------------------------------------------------------------------------------------------------------------------------------------------------------------------------------------------------------------------------------------------|---------------------|------------------------------------------------------|
| Uveitis      | <i>OHIP</i> : 364<br><i>ICD-9</i> : 364.0<br><i>ICD-10</i> : H20.0                                                                   | <ul style="list-style-type: none"> <li>• ≥5 physician claims including ≥1 by an ophthalmologist, or</li> <li>• ≥1 hospitalization with any of the specified ICD-9 or ICD-10 codes listed as reason for hospitalization or co-morbid condition (primary, secondary, or type 3 diagnosis)</li> </ul> | N/A (not validated) | Time from first diagnostic code to date of infection |
| Vasculitis   | <i>OHIP</i> : 446, 447<br><i>ICD-9</i> : 446.0, 446.2, 446.4, 446.5, 446.7<br><i>ICD-10</i> : M30, M31.0, M31.3, M31.4, M31.5, M31.7 | <ul style="list-style-type: none"> <li>• ≥3 physician claims including ≥1 by a rheumatologist, or</li> <li>• ≥1 hospitalization with any of the specified ICD-9 or ICD-10 codes listed as reason for hospitalization or co-morbid condition (primary, secondary, or type 3 diagnosis)</li> </ul>   | N/A (not validated) | Time from first diagnostic code to date of infection |

<sup>a</sup>OHIP codes are an abbreviated list of ICD-9 codes used for outpatient physician billing; ICD-9 codes are included hospital records prior to April 1, 2002; ICD-10 codes are used for hospital records beginning on April 1, 2002

<sup>b</sup>Accuracy of algorithm in the validation cohort is reported in parentheses.

Abbreviations: EMR, electronic medical record; ICD, International Classification of Diseases; NPV, negative predictive value; OHIP, Ontario Health Insurance Plan; PPV, positive predictive value; Sens, sensitivity; Spec, specificity; y, years

**eTable 2. International Classification of Diseases (ICD)-10 codes used to identify individuals developing a venous thromboembolism**

| Type of Venous Thromboembolism   | ICD-10 Code | Description                                                 |
|----------------------------------|-------------|-------------------------------------------------------------|
| Deep vein thrombosis             | I82.2       | Embolism and thrombosis of vena cava                        |
|                                  | I82.3       | Embolism and thrombosis of renal vein                       |
|                                  | I82.8       | Embolism and thrombosis of other specified veins            |
|                                  | I82.9       | Embolism and thrombosis of unspecified vein                 |
|                                  | O22.3       | Deep phlebothrombosis in pregnancy                          |
|                                  | O22.9       | Venous complication in pregnancy, unspecified               |
|                                  | O87.1       | Deep phlebothrombosis in the puerperium                     |
| Pulmonary embolism               | I26.x       | Pulmonary embolism                                          |
| Portal vein thrombosis           | I81         | Portal vein thrombosis                                      |
| Mesenteric thrombosis            | K55.0       | Acute vascular disorders of the intestine                   |
| Supraventricular vein thrombosis | G08.x       | Intracranial and intraspinal phlebitis and thrombophlebitis |
|                                  | I67.6       | Non-pyogenic thrombosis of intracranial venous system       |

Abbreviations: ICD, International Classification of Diseases

**eTable 3. International Classification of Disease (ICD)-10 codes for immune-mediated inflammatory diseases that were excluded from the adapted version of the Charlson Comorbidity Index used in this study**

| Type of IMID                          | ICD-10 Codes Excluded              |
|---------------------------------------|------------------------------------|
| Rheumatoid arthritis                  | M05, M06                           |
| Systemic autoimmune rheumatic disease | M32, M33, M34, M35.0, M35.1, M35.3 |
| Polymyalgia rheumatica                | M35.3                              |
| Vasculitis                            | M31.5                              |

Abbreviations: ICD, International Classification of Diseases; IMID, immune-mediated inflammatory diseases



**eTable 4. Previously validated algorithms used to identify individuals with selected comorbidities**

| Comorbidity                               | Diagnostic Codes <sup>a</sup>                                                                                                                                                                                                                                             | Algorithm                                                                                                                                                                                                                                                                                                                                                                                                                                                                                                                                                                                                                              | Accuracy                                                                                                                                                                                                                         |
|-------------------------------------------|---------------------------------------------------------------------------------------------------------------------------------------------------------------------------------------------------------------------------------------------------------------------------|----------------------------------------------------------------------------------------------------------------------------------------------------------------------------------------------------------------------------------------------------------------------------------------------------------------------------------------------------------------------------------------------------------------------------------------------------------------------------------------------------------------------------------------------------------------------------------------------------------------------------------------|----------------------------------------------------------------------------------------------------------------------------------------------------------------------------------------------------------------------------------|
| Chronic obstructive pulmonary disease (7) | <p><i>OHIP</i>: 491, 492, 496</p> <p><i>ICD-9</i>: 491, 492, 496</p> <p><i>ICD-10</i>: J41, J42, J43, J44</p>                                                                                                                                                             | <p>≥35 years of age and</p> <ul style="list-style-type: none"> <li>• ≥1 hospitalization or encounter in the CIHI Same Day Surgery database, or</li> <li>• ≥3 physician claims within 2 years</li> </ul>                                                                                                                                                                                                                                                                                                                                                                                                                                | <ul style="list-style-type: none"> <li>• Sens: 57.5%</li> <li>• Spec: 95.4%</li> <li>• PPV: 81.3%</li> <li>• NPV: 86.7%</li> </ul>                                                                                               |
| Congestive heart failure (8)              | <p><i>OHIP</i>:</p> <ul style="list-style-type: none"> <li>• Diagnostic code: 428</li> <li>• Fee code: Q050</li> </ul> <p><i>ICD-9</i>: 428</p> <p><i>ICD-10</i>: I50.0, I50.1, I50.9</p>                                                                                 | <p>≥40 years of age and</p> <ul style="list-style-type: none"> <li>• ≥1 hospitalization, or</li> <li>• ≥1 physician claim (diagnostic or fee code) or emergency department visit and ≥1 additional encounter of any form (outpatient, emergency department, or hospitalization) within 1 year</li> </ul>                                                                                                                                                                                                                                                                                                                               | <ul style="list-style-type: none"> <li>• Sens: 84.8%</li> <li>• Spec: 97.0 %</li> <li>• PPV: 55.6%</li> </ul>                                                                                                                    |
| Diabetes (9, 10)                          | <p><i>OHIP</i>:</p> <ul style="list-style-type: none"> <li>• Diagnostic code: 250</li> <li>• Fee codes: Q040, K029, K030, K045, K046</li> </ul> <p><i>ICD-9</i>: 250</p> <p><i>ICD-10</i>: E10, E11, E13, E14</p> <p><i>Medications</i>: insulin, oral anti-glycemics</p> | <p>Pediatrics (≤18y):</p> <ul style="list-style-type: none"> <li>• ≥4 physician claims with diagnostic code for diabetes within 2 years, or</li> <li>• ≥1 physician claims with fee code for diabetes</li> <li>• ≥1 of these encounters occurs before an individual’s 19<sup>th</sup> birthday</li> </ul> <p>Adults (&gt;18y):</p> <ul style="list-style-type: none"> <li>• ≥2 physician claims with a diagnostic code for diabetes within 1 year, or</li> <li>• ≥1 prescription for a diabetes medication, or</li> <li>• ≥1 hospitalization</li> <li>• All encounters occur after an individual’s 19<sup>th</sup> birthday</li> </ul> | <p>Pediatrics (≤18y):</p> <ul style="list-style-type: none"> <li>• Sens: 82.8%</li> <li>• Spec: 98.9%</li> </ul> <p>Adults (&gt;18y):</p> <ul style="list-style-type: none"> <li>• Sens: 90.0%</li> <li>• Spec: 97.7%</li> </ul> |

| Comorbidity | Diagnostic Codes <sup>a</sup> | Algorithm                                                                                                                                                                                                                                                                                           | Accuracy                                                                             |
|-------------|-------------------------------|-----------------------------------------------------------------------------------------------------------------------------------------------------------------------------------------------------------------------------------------------------------------------------------------------------|--------------------------------------------------------------------------------------|
|             |                               | Physician claims, prescription records, or hospitalizations occurring up to 120 days before and 180 days after a hospital record with a diagnostic code for pregnancy care or delivery was considered to be related to gestational diabetes and excluded from the case definitions described above. | <ul style="list-style-type: none"> <li>• PPV: 82.6%</li> <li>• NPV: 98.8%</li> </ul> |

Abbreviations: CI, confidence interval; CIHI, Canadian Institute for Health Information; ICD, International Classification of Diseases; NPV, negative predictive value; OHIP, Ontario Health Insurance Plan; PPV, positive predictive value; Sens, sensitivity; Spec, specificity; y, years

<sup>a</sup>OHIP codes are an abbreviated list of ICD-9 codes used for outpatient physician billing; ICD-9 codes are included hospital records prior to April 1, 2002; ICD-10 codes are used for hospital records beginning on April 1, 2002

**eTable 5. Demographics and clinical characteristics of individuals with immune-mediated inflammatory diseases (IMIDs) and matched people without an IMID on the date of positive COVID-19 test, stratified by type of IMID**

| Characteristic                               | People with Specified IMID | Matched People without an IMID |
|----------------------------------------------|----------------------------|--------------------------------|
| <b>Ankylosing Spondylitis</b>                |                            |                                |
| n                                            | 1453                       | 6600                           |
| Age (years), mean (SD)                       | 50.8 (15.7)                | 49.5 (14.9)                    |
| Female, n (%)                                | 699 (48.1)                 | 3151 (48.7)                    |
| Rural, n (%)                                 | 50 (3.4)                   | 100 (1.5)                      |
| Mean neighborhood income quintile, n (%)     |                            |                                |
| 1 (lowest)                                   | 301 (20.7)                 | 1378 (20.9)                    |
| 2                                            | 282 (19.4)                 | 1293 (19.6)                    |
| 3                                            | 300 (20.6)                 | 1398 (21.2)                    |
| 4                                            | 293 (20.2)                 | 1313 (19.9)                    |
| 5 (highest)                                  | 277 (19.1)                 | 1218 (18.5)                    |
| Previous VTE, n (%)                          | 13 (0.9)                   | 41 (0.6)                       |
| Chronic obstructive pulmonary disease, n (%) | 58 (4.0)                   | 112 (1.7)                      |
| Congestive heart failure, n (%)              | 52 (3.6)                   | 137 (2.1)                      |
| Diabetes, n (%)                              | 268 (18.4)                 | 1066 (16.2)                    |
| Charlson Comorbidity Index, median (Q1, Q3)  | 1 (0, 2)                   | 0 (0, 1)                       |
| IMID duration, n (%)                         |                            |                                |
| <1 year                                      | 79 (5.4)                   | N/A                            |
| 1 to <3 years                                | 189 (13.0)                 | N/A                            |
| 3 to <5 years                                | 179 (12.3)                 | N/A                            |
| ≥5 years                                     | 1006 (69.2)                | N/A                            |
| Number of additional IMIDs, n (%)            |                            |                                |
| 0                                            | 830 (57.1)                 | N/A                            |
| 1                                            | 413 (28.4)                 | N/A                            |
| ≥2                                           | 210 (14.5)                 | N/A                            |
| COVID-19 vaccination, n (%)                  | 447 (30.8)                 | 1915 (29.0)                    |
| <b>Inflammatory Bowel Disease</b>            |                            |                                |
| n                                            | 4331                       | 19,903                         |
| Age (years), mean (SD)                       | 46.0 (17.2)                | 44.7 (16.5)                    |
| Female, n (%)                                | 2166 (50.0)                | 9892 (49.7)                    |
| Rural, n (%)                                 | 150 (3.5)                  | 328 (1.6)                      |
| Mean neighborhood income quintile, n (%)     |                            |                                |
| 1 (lowest)                                   | 754 (17.4)                 | 3447(17.3)                     |
| 2                                            | 856 (19.8)                 | 3944 (19.8)                    |
| 3                                            | 900 (20.8)                 | 4124 (20.7)                    |
| 4                                            | 894 (20.6)                 | 4086 (20.5)                    |

| Characteristic                               | People with Specified IMID | Matched People without an IMID |
|----------------------------------------------|----------------------------|--------------------------------|
| 5 (highest)                                  | 927 (21.4)                 | 4302 (21.6)                    |
| Previous VTE, n (%)                          | 63 (1.5)                   | 96 (0.5)                       |
| Chronic obstructive pulmonary disease, n (%) | 126 (2.9)                  | 287 (1.4)                      |
| Congestive heart failure, n (%)              | 128 (3.0)                  | 297 (1.5)                      |
| Diabetes, n (%)                              | 563 (13.0)                 | 2521 (12.7)                    |
| Charlson Comorbidity Index, median (Q1, Q3)  | 0 (0, 1)                   | 0 (0, 1)                       |
| Type of IBD, n (%)                           |                            |                                |
| Crohn's disease                              | 1888 (43.6)                | N/A                            |
| Ulcerative colitis                           | 2260 (52.2)                | N/A                            |
| IBD-U                                        | 183 (4.2)                  | N/A                            |
| IMID duration, n (%)                         |                            |                                |
| <1 year                                      | 68 (1.6)                   | N/A                            |
| 1 to <3 years                                | 340 (7.9)                  | N/A                            |
| 3 to <5 years                                | 407 (9.4)                  | N/A                            |
| ≥5 years                                     | 3516 (81.2)                | N/A                            |
| Number of additional IMIDs, n (%)            |                            |                                |
| 0                                            | 3807 (87.9)                | N/A                            |
| 1                                            | 423 (9.8)                  | N/A                            |
| ≥2                                           | 101 (2.3)                  | N/A                            |
| COVID-19 vaccination, n (%)                  | 1469 (33.9)                | 6521 (32.8)                    |
| <b>Multiple Sclerosis</b>                    |                            |                                |
| n                                            | 1954                       | 8799                           |
| Age (years), mean (SD)                       | 50.6 (15.6)                | 49.3 (15.1)                    |
| Female, n (%)                                | 1381 (70.7)                | 6201 (70.6)                    |
| Rural, n (%)                                 | 73 (3.7)                   | 159 (1.8)                      |
| Mean neighborhood income quintile, n (%)     |                            |                                |
| 1 (lowest)                                   | 440 (22.5)                 | 1989 (22.7)                    |
| 2                                            | 413 (21.1)                 | 1847 (21.0)                    |
| 3                                            | 376 (19.2)                 | 1718 (19.6)                    |
| 4                                            | 381 (19.5)                 | 1707 (19.4)                    |
| 5 (highest)                                  | 344 (17.6)                 | 1518 (17.3)                    |
| Previous VTE, n (%)                          | 40 (2.0)                   | 43 (0.5)                       |
| Chronic obstructive pulmonary disease, n (%) | 59 (3.0)                   | 184 (2.1)                      |
| Congestive heart failure, n (%)              | 84 (4.3)                   | 189 (2.2)                      |
| Diabetes, n (%)                              | 306 (15.7)                 | 1304 (14.9)                    |
| Charlson Comorbidity Index, median (Q1, Q3)  | 1 (0, 2)                   | 0 (0, 1)                       |
| IMID duration, n (%)                         |                            |                                |
| <1 year                                      | 103 (5.3)                  | N/A                            |

| Characteristic                               | People with Specified IMID | Matched People without an IMID |
|----------------------------------------------|----------------------------|--------------------------------|
| 1 to <3 years                                | 229 (11.7)                 | N/A                            |
| 3 to <5 years                                | 162 (8.3)                  | N/A                            |
| ≥5 years                                     | 1,460 (74.7)               | N/A                            |
| Number of additional IMIDs, n (%)            |                            |                                |
| 0                                            | 1805 (92.4)                | N/A                            |
| 1                                            | 126 (6.5)                  | N/A                            |
| ≥2                                           | 23 (1.2)                   | N/A                            |
| COVID-19 vaccination, n (%)                  | 522 (26.7)                 | 2425 (27.6)                    |
| <b>Polymyalgia Rheumatica</b>                |                            |                                |
| n                                            | 535                        | 1902                           |
| Age (years), mean (SD)                       | 76.6 (13.1)                | 74.5 (13.6)                    |
| Female, n (%)                                | 354 (66.2)                 | 1241 (65.2)                    |
| Rural, n (%)                                 | 12 (2.2)                   | 23 (1.2)                       |
| Mean neighborhood income quintile, n (%)     |                            |                                |
| 1 (lowest)                                   | 116 (21.7)                 | 449 (23.6)                     |
| 2                                            | 120 (22.4)                 | 436 (22.9)                     |
| 3                                            | 111 (20.7)                 | 391 (20.6)                     |
| 4                                            | 98 (18.3)                  | 356 (18.7)                     |
| 5 (highest)                                  | 90 (16.8)                  | 270 (14.2)                     |
| Previous VTE, n (%)                          | 17 (3.2)                   | 30 (1.6)                       |
| Chronic obstructive pulmonary disease, n (%) | 60 (11.2)                  | 155 (8.1)                      |
| Congestive heart failure, n (%)              | 114 (21.3)                 | 293 (15.4)                     |
| Diabetes, n (%)                              | 212 (39.6)                 | 722 (38.0)                     |
| Charlson Comorbidity Index, median (Q1, Q3)  | 2 (1, 5)                   | 2 (1, 3)                       |
| IMID duration, n (%)                         |                            |                                |
| <1 year                                      | 60 (11.2)                  | N/A                            |
| 1 to <3 years                                | 111 (20.7)                 | N/A                            |
| 3 to <5 years                                | 88 (16.4)                  | N/A                            |
| ≥5 years                                     | 276 (51.6)                 | N/A                            |
| Number of additional IMIDs, n (%)            |                            |                                |
| 0                                            | 359 (67.1)                 | N/A                            |
| 1                                            | 139 (26.0)                 | N/A                            |
| ≥2                                           | 37 (6.9)                   | N/A                            |
| COVID-19 vaccination, n (%)                  | 97 (18.1)                  | 321 (16.9)                     |
| <b>Psoriatic Arthritis</b>                   |                            |                                |
| N                                            | 1134                       | 5085                           |
| Age (years), mean (SD)                       | 54.1 (14.6)                | 52.7 (14.0)                    |
| Female, n (%)                                | 584 (51.5)                 | 2553 (50.2)                    |
| Rural, n (%)                                 | 35 (3.1)                   | 95 (1.9)                       |

| Characteristic                               | People with Specified IMID | Matched People without an IMID |
|----------------------------------------------|----------------------------|--------------------------------|
| Mean neighborhood income quintile, n (%)     |                            |                                |
| 1 (lowest)                                   | 252 (22.2)                 | 1116 (21.9)                    |
| 2                                            | 209 (18.4)                 | 961 (18.9)                     |
| 3                                            | 210 (18.5)                 | 971 (19.1)                     |
| 4                                            | 231 (20.4)                 | 1027 (20.2)                    |
| 5 (highest)                                  | 232 (20.5)                 | 1010 (19.9)                    |
| Previous VTE event, n (%)                    | 15 (1.3)                   | 36 (0.7)                       |
| Chronic obstructive pulmonary disease, n (%) | 40 (3.5)                   | 123 (2.4)                      |
| Congestive heart failure, n (%)              | 56 (4.9)                   | 128 (2.5)                      |
| Diabetes, n (%)                              | 292 (25.7)                 | 901 (17.7)                     |
| Charlson Comorbidity Index, median (Q1, Q3)  | 1 (0, 2)                   | 0 (0, 1)                       |
| IMID duration, n (%)                         |                            |                                |
| <1 year                                      | 26 (2.3)                   | N/A                            |
| 1 to <3 years                                | 64 (5.6)                   | N/A                            |
| 3 to <5 years                                | 81 (7.1)                   | N/A                            |
| ≥5 years                                     | 963 (84.9)                 | N/A                            |
| Number of additional IMIDs, n (%)            |                            |                                |
| 0                                            | 162 (14.3)                 | N/A                            |
| 1                                            | 622 (54.9)                 | N/A                            |
| ≥2                                           | 350 (30.9)                 | N/A                            |
| COVID-19 vaccination, n (%)                  | 355 (31.3)                 | 1478 (29.1)                    |
| <b>Psoriasis</b>                             |                            |                                |
| n                                            | 10,739                     | 48,743                         |
| Age (years), mean (SD)                       | 49.9 (18.2)                | 48.3 (17.4)                    |
| Female, n (%)                                | 5424 (50.5)                | 24,500 (50.3)                  |
| Rural, n (%)                                 | 342 (3.2)                  | 763 (1.6)                      |
| Mean neighborhood income quintile, n (%)     |                            |                                |
| 1 (lowest)                                   | 2252 (21.0)                | 10,273 (21.1)                  |
| 2                                            | 2147 (20.0)                | 9772 (20.0)                    |
| 3                                            | 2199 (20.5)                | 10,103 (20.7)                  |
| 4                                            | 2126 (19.8)                | 9631 (19.8)                    |
| 5 (highest)                                  | 2015 (18.8)                | 8964 (18.4)                    |
| Previous VTE, n (%)                          | 97 (0.9)                   | 322 (0.7)                      |
| Chronic obstructive pulmonary disease, n (%) | 390 (3.6)                  | 1034 (2.1)                     |
| Congestive heart failure, n (%)              | 448 (4.2)                  | 1284 (2.6)                     |
| Diabetes, n (%)                              | 2138 (19.9)                | 7719 (15.8)                    |
| Charlson Comorbidity Index, median (Q1, Q3)  | 0 (0, 2)                   | 0 (0, 1)                       |

| Characteristic                               | People with Specified IMID | Matched People without an IMID |
|----------------------------------------------|----------------------------|--------------------------------|
| IMID duration, n (%)                         |                            |                                |
| <1 year                                      | 299 (2.8)                  | N/A                            |
| 1 to <3 years                                | 782 (7.3)                  | N/A                            |
| 3 to <5 years                                | 783 (7.3)                  | N/A                            |
| ≥5 years                                     | 8875 (82.6)                | N/A                            |
| Number of additional IMIDs, n (%)            |                            |                                |
| 0                                            | 9302 (86.6)                | N/A                            |
| 1                                            | 1051 (9.8)                 | N/A                            |
| ≥2                                           | 386 (3.6)                  | N/A                            |
| COVID-19 vaccination, n (%)                  | 2996 (27.9)                | 13,649 (28.0)                  |
| <b>Rheumatoid Arthritis</b>                  |                            |                                |
| n                                            | 5883                       | 24,993                         |
| Age (years), mean (SD)                       | 59.5 (17.4)                | 57.2 (16.9)                    |
| Female, n (%)                                | 4329 (73.6)                | 18,352 (73.4)                  |
| Rural, n (%)                                 | 206 (3.5)                  | 393 (1.6)                      |
| Mean neighborhood income quintile, n (%)     |                            |                                |
| 1 (lowest)                                   | 1340 (22.8)                | 5721 (22.9)                    |
| 2                                            | 1274 (21.7)                | 5446 (21.8)                    |
| 3                                            | 1267 (21.5)                | 5524 (22.1)                    |
| 4                                            | 1061 (18.0)                | 4490 (18.0)                    |
| 5 (highest)                                  | 941 (16.0)                 | 3812 (15.3)                    |
| Previous VTE, n (%)                          | 125 (2.1)                  | 211 (0.8)                      |
| Chronic obstructive pulmonary disease, n (%) | 440 (7.5)                  | 869 (3.5)                      |
| Congestive heart failure, n (%)              | 483 (8.2)                  | 1175 (4.7)                     |
| Diabetes, n (%)                              | 1579 (26.8)                | 5777 (23.1)                    |
| Charlson Comorbidity Index, median (Q1, Q3)  | 2 (1, 3)                   | 0 (0, 2)                       |
| IMID duration, n (%)                         |                            |                                |
| <1 year                                      | 271 (4.6)                  | N/A                            |
| 1 to <3 years                                | 797 (13.5)                 | N/A                            |
| 3 to <5 years                                | 790 (13.4)                 | N/A                            |
| ≥5 years                                     | 4,025 (68.4)               | N/A                            |
| Number of additional IMIDs, n (%)            |                            |                                |
| 0                                            | 4480 (76.2)                | N/A                            |
| 1                                            | 998 (17.0)                 | N/A                            |
| ≥2                                           | 405 (6.9)                  | N/A                            |
| COVID-19 vaccination, n (%)                  | 1357 (23.1)                | 5669 (22.7)                    |
| <b>Systemic Autoimmune Rheumatic Disease</b> |                            |                                |
| n                                            | 2506                       | 11,265                         |
| Age (years), mean (SD)                       | 51.7 (17.5)                | 50.0 (16.6)                    |

| Characteristic                               | People with Specified IMID | Matched People without an IMID |
|----------------------------------------------|----------------------------|--------------------------------|
| Female, n (%)                                | 2141 (85.4)                | 9674 (85.9)                    |
| Rural, n (%)                                 | 78 (3.1)                   | 173 (1.5)                      |
| Mean neighborhood income quintile, n (%)     |                            |                                |
| 1 (lowest)                                   | 563 (22.5)                 | 2566 (22.8)                    |
| 2                                            | 501 (20.0)                 | 2234 (19.8)                    |
| 3                                            | 534 (21.3)                 | 2412 (21.4)                    |
| 4                                            | 451 (18.0)                 | 2056 (18.3)                    |
| 5 (highest)                                  | 457 (18.2)                 | 1997 (17.7)                    |
| Previous VTE, n (%)                          | 86 (3.4)                   | 86 (0.8)                       |
| Chronic obstructive pulmonary disease, n (%) | 127 (5.1)                  | 218 (1.9)                      |
| Congestive heart failure, n (%)              | 174 (6.9)                  | 283 (2.5)                      |
| Diabetes, n (%)                              | 480 (19.2)                 | 1827 (16.2)                    |
| Charlson Comorbidity Index, median (Q1, Q3)  | 1 (0, 3)                   | 0 (0, 1)                       |
| IMID duration, n (%)                         |                            |                                |
| <1 year                                      | 176 (7.0)                  | N/A                            |
| 1 to <3 years                                | 373 (14.9)                 | N/A                            |
| 3 to <5 years                                | 294 (11.7)                 | N/A                            |
| ≥5 years                                     | 1663 (66.4)                | N/A                            |
| Number of additional IMIDs, n (%)            |                            |                                |
| 0                                            | 1854 (74.0)                | N/A                            |
| 1                                            | 555 (22.2)                 | N/A                            |
| ≥2                                           | 97 (3.9)                   | N/A                            |
| COVID-19 vaccination, n (%)                  | 664 (26.5)                 | 3025 (26.9)                    |
| <b>Uveitis</b>                               |                            |                                |
| n                                            | 3000                       | 12,742                         |
| Age (years), mean (SD)                       | 57.8 (19.8)                | 55.0 (19.0)                    |
| Female, n (%)                                | 1635 (54.5)                | 6805 (53.4)                    |
| Rural, n (%)                                 | 84 (2.8)                   | 191 (1.5)                      |
| Mean neighborhood income quintile, n (%)     |                            |                                |
| 1 (lowest)                                   | 739 (24.6)                 | 3144 (24.7)                    |
| 2                                            | 606 (20.2)                 | 2593 (20.4)                    |
| 3                                            | 599 (20.0)                 | 2610 (20.5)                    |
| 4                                            | 550 (18.3)                 | 2330 (18.3)                    |
| 5 (highest)                                  | 506 (16.9)                 | 2065 (16.2)                    |
| Previous VTE, n (%)                          | 40 (1.3)                   | 104 (0.8)                      |
| Chronic obstructive pulmonary disease, n (%) | 176 (5.9)                  | 433 (3.4)                      |
| Congestive heart failure, n (%)              | 226 (7.5)                  | 593 (4.7)                      |
| Diabetes, n (%)                              | 856 (28.5)                 | 2692 (21.1)                    |



| <b>Characteristic</b>                       | <b>People with Specified IMID</b> | <b>Matched People without an IMID</b> |
|---------------------------------------------|-----------------------------------|---------------------------------------|
| Charlson Comorbidity Index, median (Q1, Q3) | 1 (0, 2)                          | 0 (0, 2)                              |
| IMID duration, n (%)                        |                                   |                                       |
| <1 year                                     | 119 (4.0)                         | N/A                                   |
| 1 to <3 years                               | 195 (6.5)                         | N/A                                   |
| 3 to <5 years                               | 244 (8.1)                         | N/A                                   |
| ≥5 years                                    | 2442 (81.4)                       | N/A                                   |
| Number of additional IMIDs, n (%)           |                                   |                                       |
| 0                                           | 2478 (82.6)                       | N/A                                   |
| 1                                           | 420 (14.0)                        | N/A                                   |
| ≥2                                          | 102 (3.4)                         | N/A                                   |
| COVID-19 vaccination, n (%)                 | 706 (23.5)                        | 3094 (24.3)                           |

Abbreviations: IBD, inflammatory bowel disease; IBD-U, inflammatory bowel disease type unclassifiable; IMID, immune-mediated inflammatory disease; VTE, venous thromboembolism

**eFigure 1. Forest plot depicting the unadjusted hazard ratio of venous thromboembolism among individuals with and without (reference) an immune-mediated inflammatory disease (IMID) following COVID-19 infection, stratified by type of IMID**

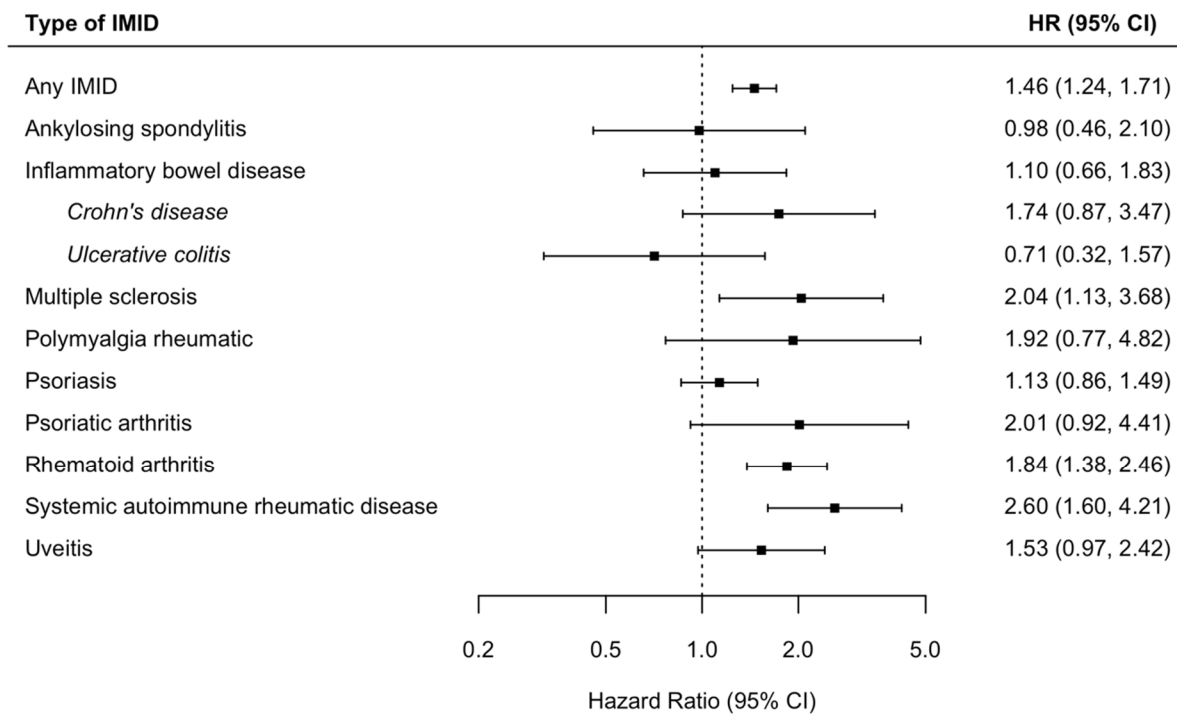

**eFigure 2. Forest plot depicting the hazard ratio of venous thromboembolism among individuals with and without (reference) an immune-mediated inflammatory disease (IMID) following COVID-19 infection, adjusted for previous VTE and COVID-19 vaccination stratified by type of IMID**

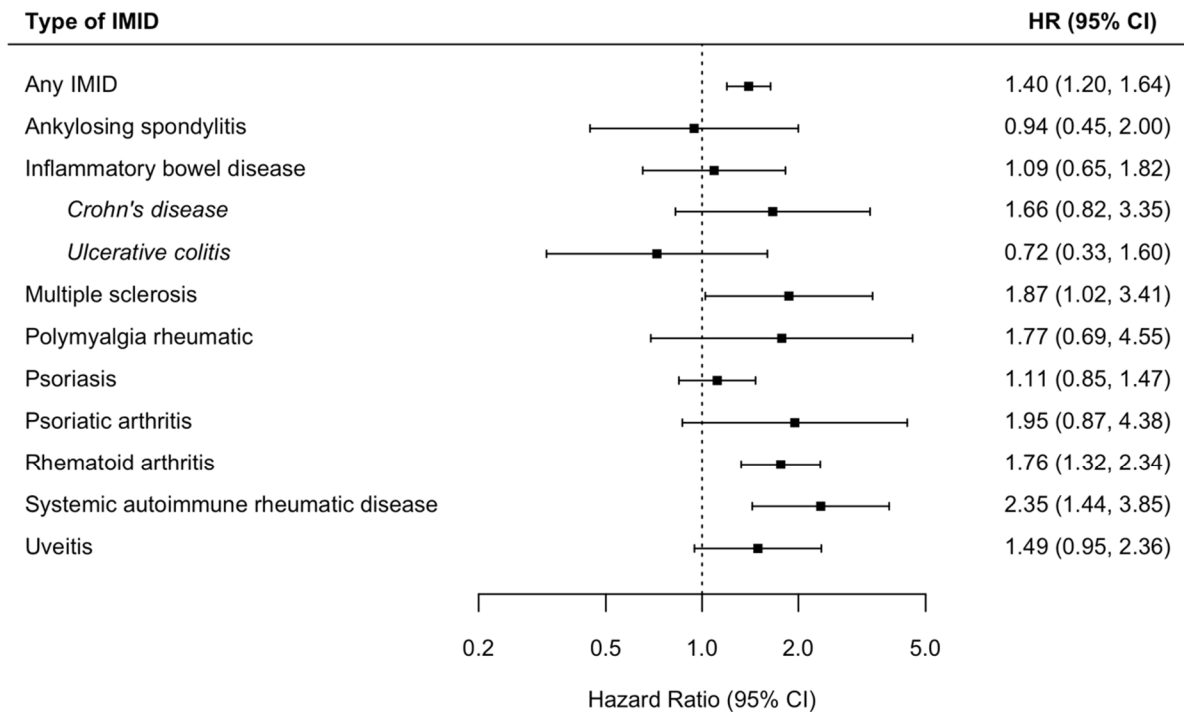

## eReferences

1. Benchimol EI, Guttman A, Griffiths AM, Rabeneck L, Mack DR, Brill H, et al. Increasing incidence of paediatric inflammatory bowel disease in Ontario, Canada: evidence from health administrative data. *Gut*. 2009;58(11):1490-7.
2. Benchimol EI, Guttman A, Mack DR, Nguyen GC, Marshall JK, Gregor JC, et al. Validation of international algorithms to identify adults with inflammatory bowel disease in health administrative data from Ontario, Canada. *J Clin Epidemiol*. 2014;67(8):887-96.
3. Widdifield J, Ivers NM, Young J, Green D, Jaakkimainen L, Butt DA, et al. Development and validation of an administrative data algorithm to estimate the disease burden and epidemiology of multiple sclerosis in Ontario, Canada. *Mult Scler*. 2015;21(8):1045-54.
4. Eder L, Widdifield J, Rosen CF, Alhusayen R, Cheng SY, Young J, et al. Identifying and Characterizing Psoriasis and Psoriatic Arthritis Patients in Ontario Administrative Data: A Population-based Study From 1991 to 2015. *J Rheumatol*. 2020;47(11):1644-51.
5. Widdifield J, Bombardier C, Bernatsky S, Paterson JM, Green D, Young J, et al. An administrative data validation study of the accuracy of algorithms for identifying rheumatoid arthritis: the influence of the reference standard on algorithm performance. *BMC Musculoskelet Disord*. 2014;15:216.
6. Widdifield J, Bernatsky S, Paterson JM, Tu K, Ng R, Thorne JC, et al. Accuracy of Canadian health administrative databases in identifying patients with rheumatoid arthritis: a validation study using the medical records of rheumatologists. *Arthritis Care Res (Hoboken)*. 2013;65(10):1582-91.
7. Gershon AS, Wang C, Guan J, Vasilevska-Ristovska J, Cicutto L, To T. Identifying individuals with physician diagnosed COPD in health administrative databases. *COPD*. 2009;6(5):388-94.
8. Schultz SE, Rothwell DM, Chen Z, Tu K. Identifying cases of congestive heart failure from administrative data: a validation study using primary care patient records. *Chronic Dis Inj Can*. 2013;33(3):160-6.
9. Lipscombe LL, Hwee J, Webster L, Shah BR, Booth GL, Tu K. Identifying diabetes cases from administrative data: a population-based validation study. *BMC Health Serv Res*. 2018;18(1):316.
10. Guttman A, Nakhla M, Henderson M, To T, Daneman D, Cauch-Dudek K, et al. Validation of a health administrative data algorithm for assessing the epidemiology of diabetes in Canadian children. *Pediatr Diabetes*. 2010;11(2):122-8.
